# Supplementary material for: Almost Being There: Video Communication with Young Children
Source: PLoS One. 2011 Feb 24;6(2):e17129. doi: 10.1371/journal.pone.0017129 (PMC3044757; doi:10.1371/journal.pone.0017129)
Supplement: Data S1 — Supporting data. (XLS) [file pone.0017129.s001.xls]

## Sheet: Sheet1
Gender (M=1, F=2)	Age group	Are they under 2 years of age (1=Yes, 2=No)	Participating parent (1=mother, 2=father)	Had they previously video-chatted (1=Yes, 2=No)	Security Score	Separation order (1=VC separation 1st, 2=VC separation 2nd)	VC sep. Content duration	VC sep. Number of bins	Non VC sep. Content duration	Non VC sep. Number of bins	Freeplay. Number of bins	Content Duration. Difference between VC sep and Non VC sep	Interaction. Difference between freeplay and VC sep	VC Proximity	NonVC Proximity	Freeplay. Number of play intervals	VC sep. Number of play intervals	NonVC sep. Number of play intervals	VC sep. Number of interaction intervals	Freplay. Number of interaction intervals	VC Se. Did they last for entire 300 sec? (1=Yes, 0=No)	NVC Sep. Did they last for entire 300 sec? (1=Yes, 0=No)	VC Sep. Play ratio	Non VC Sep. Play percentage	Freeplay. Play percentage	VC Sep. Interaction percentage	Freeplay. Interaction percentage
2	1	1	1	2		2	300	30	4	1	30	296	0.07	0	0	29	1	0	30	28	1	0	3	0	97	1	93
1	1	1	1	2	0.53	2	300	30	300	30	30	0	0.2	0	0	25	19	16	30	24	1	1	63	53	83	1	80
1	1	1	1			2	0	0	2	1	30	-2	-0.12	0	1	26	0	0	0	27	0	0	0	0	87		90
2	1	1	1		0.44	2	28	3	2	1	30	26	-0.1	0	1	25	0	0	3	28	0	0	0	0	83	1	93
2	1	1	1	2	0.36	1	300	30	300	30	30	0	0.2	0	0	28	16	19	29	23	1	1	53	63	93	0.97	77
2	1	1	1	2	0.54	1	300	30	0	0	30	300	0.13	0	1	29	5	0	30	26	1	0	17	0	97	1	87
1	1	1	1	2	0.42	2	0	0	0	0	30	0	-0.9	0	1	27	0	0	0	27	0	0	0	0	90		90
2	1	1	1	2	0.6	2	98	10	0	0	30	98	0.5	1	0	29	3	0	10	15	0	0	30	0	97	1	50
1	1	1	1	2	0.41	1	300	30	0	0	30	300	1	0	1	29	9	0	30	28	1	0	30	0	97	1	93
2	1	1	2	2		2	300	30	300	30	14	0	-0.46	0	0	14	23	20	10	11	1	1	77	67	100	0.33	79
2	2	2	1	2		2	70	7	2	1	15	68	0	0	0	15	0	0	6	14	0	0	0	0	100	0.86	93
1	2	2	1	1	0.57	2	31	4	3	1	30	28	-0.26	0	0	30	0	0	3	25	0	0	0	0	100	0.75	83
1	2	2	1	2	0.48	2	300	30	0	0	30	300	0	0	1	30	18	0	30	30	1	0	60	0	100	1	100
1	2	2	1	1	0.13	2	300	30	300	30	30	0	-0.03	0	0	30	29	26	28	30	1	1	97	87	100	0.93	100
2	2	2	1	1	0.64	2	1	1	300	30	30	-299	-0.07	0	0	30	0	12	1	30	0	1	0	40	100	1	100
2	2	2	1	2	0.07	1	300	30	55	6	30	245	-0.07	0	1	25	12	3	28	30	1	0	40	50	83	0.93	100
2	2	2	1	1		1	7	1	0	0	30	7	1	0	0	28	0	0	1	30	0	0	0	0	93	1	100
2	3	2	1	2		1	189	9	108	11	22	81	-0.36	0	0	22	0	4	9	19	0	0	0	36	100	1	86
2	3	2	1	2		1	300	30	119	12	19	181	-0.37	0	0	19	29	12	19	19	1	0	97	100	100	0.63	100
1	3	2	1	2	0.1	2	300	30	72	8	30	228	-0.03	0	0	27	19	5	28	30	1	0	63	63	90	0.93	100
2	3	2	1	1	0.54	1	300	30	44	5	30	256	-0.08	0	0	30	17	0	23	27	1	0	57	0	100	0.77	90
1	3	2	1	2	0.46	1	300	30	300	30	30	0	0.33	0	0	20	26	27	27	17	1	1	87	90	67	0.9	57
1	3	2	1	2	0.34	1	300	30	300	30	30	0	-0.03	0	0	30	18	19	23	24	1	1	60	63	100	0.77	80
1	3	2	1	2	0.42	1	300	30	0	0	30	0	0.06	0	0	30	3	0	25	23	1	0	10	0	100	0.83	77
2	3	2	2	2		2	4	1	0	0	30	4	-0.2	0	0	30	0	0	1	21	0	0	0	0	100	1	70
1	4	2	1	2		1	300	30	300	30	18	0	0.3	1	0	18	28	19	29	12	1	1	93	63	100	0.97	67
1	4	2	1	2	0.73	1	300	30	140	14	30	160	0.16	0	0	27	2	10	28	23	1	0	7	71	90	0.93	77
2	4	2	1	1	0.44	2	300	30	70	7	30	230	-0.01	0	0	17	27	4	26	29	1	0	90	57	57	0.87	97
2	4	2	1	2	0.29	1	300	30	274	28	30	26	-0.03	0	0	29	28	19	29	30	1	0	93	68	97	0.97	100
2	4	2	1	2	0.54	1	300	30	300	30	30	0	0.03	0	0	28	30	30	27	26	1	1	100	100	93	0.9	87
2	4	2	1	2		1	300	30	8	1	30	292	-0.27	0	0	23	9	1	22	30	1	0	30	100	77	0.73	100
1	4	2	2	2	0.44	2	300	30	300	30	30	0	-0.07	0	0	29	26	28	28	30	1	1	87	93	97	0.93	100
1	5	2	1	2		2	300	30	0	0	26	300	0.16	0	0	25	11	0	29	21	1	0	37	0	96	0.97	81
2	5	2	1	2		2	300	30	85	9	18	215	0.18	0	0	18	19	9	17	7	1	0	63	100	100	0.57	39
1	5	2	1	1	0.73	2	300	30	300	30	30	0	-0.07	0	0	17	9	15	27	29	1	1	30	50	57	0.9	97
1	5	2	1	2	0.26	1	300	30	19	2	30	281	0.26	0	0	25	9	2	28	20	1	0	30	100	83	0.93	67
1	5	2	1	1	0.01	2	300	30	300	30	30	0	-0.1	0	0	30	23	30	27	30	1	1	77	100	100	0.9	100
1	5	2	1	1	0.5	2	300	30	300	30	30	0	0.1	0	0	30	26	19	29	26	1	1	87	63	100	0.97	87
2	5	2	1	2		1	300	30	0	0	30	300	0.03	0	0	29	6	0	27	26	1	0	20	0	97	0.9	87
1	5	2	2	1		2	300	30	300	30	13	0	-0.3	0	0	13	24	6	21	13	1	1	80	20	100	0.7	100
2	5	2	2	2	0.42	1	300	30	300	30	30	0	0.17	0	0	30	26	17	30	25	1	1	87	57	100	1	83
